# Supplementary material
Source: publisher site journal article supplement (https://static.cambridge.org/content/id/urn:cambridge.org:id:article:S0016756818000924/resource/name/S0016756818000924supp002.xls)
Supplement: Supplementary file 1 [file S0016756818000924supp002.xls]

## Sheet: Foglio1
Supplementary Table S2. CIPW norms of the Barda and Alech rocks
Sample	BR1	BR3	BR4	BR5	BR7	BR11	BR12	AL1	AL3	AL4	AL5	AL7	AL8	AL9	AL10	AL11
rock type	gph	gph	b.a.	gph	gph	gph	gph	rhy	rhy	rhy	rhy	dac	rhy	rhy	rhy	dac
qz	27.2083	30.2394	7.03	31.0023	30.7427	29.7663	27.8861	25.6108	85.2285	24.2931	71.9977	28.3097	29.3549	31.1911	73.407	38.3535
cor	0.870263	0	0	0.53773	0	0	0	1.81139	6.50944	0.308621	11.2422	0.78991	1.47694	0	9.90779	5.35426
or	22.632	22.8092	4.90458	22.4547	23.5774	23.5774	20.9774	29.3093	0.650004	28.1865	6.14549	19.2638	25.4683	24.5229	3.25002	25.3502
ab	34.7752	34.0137	21.6605	34.0983	33.506	34.0983	35.3675	33.083	0.253833	37.1443	0.507667	24.8757	26.3141	30.9677	0.253833	6.34584
an	2.60052	3.13489	32.4157	1.47257	1.98344	2.37865	3.08667	0.976494	0.960835	1.65534	1.12795	8.41776	4.67101	2.53005	-0.334111	0.514477
ne	0	0	0	0	0	0	0	0	0	0	0	0	0	0	0	0
lc	0	0	0	0	0	0	0	0	0	0	0	0	0	0	0	0
ac	0	0	0	0	0	0	0	0	0	0	0	0	0	0	0	0
di	0	2.32118	2.67845	0	2.81083	1.88338	3.71908	0	0	0	0	0	0	0.477521	0	0
hy	7.16071	4.47089	24.4294	6.14052	3.85829	4.45459	5.10375	4.43493	1.01095	5.42573	0.961409	10.8373	6.98072	6.29407	4.69686	13.5422
ol	0	0	0	0	0	0	0	0	0	0	0	0	0	0	0	0
mt	1.29167	1.04174	2.99031	1.08598	0.962117	0.984235	1.25407	0.80287	0.227812	0.979811	0.409176	1.96183	1.10367	1.17666	0.973176	2.53689
il	0.898345	0.65714	2.11766	0.58117	0.554581	0.567875	0.655241	0.660939	0.450122	0.641946	1.93154	1.48331	1.08637	0.436827	1.38835	2.13286
hm	0	0	0	0	0	0	0	0	0	0	0	0	0	0	0	0
ap	0.118434	0.0213181	0.0947471	0.0236868	0.0213181	0.0236868	0.0236868	0.0236868	0.0473735	0.0473735	0.0947471	0.473735	0.213181	0.0213181	0.355302	0.497422
aq	1.64	0.41	0.3	1.09	0.86	0.41	1.27	2.06	3.44	1.01	5.51	3.26	2.85	1.47	4.94	4.83
Totale	99.1954	99.1195	98.6213	98.4869	98.8768	98.1445	99.3435	98.7733	98.7789	99.6928	99.9279	99.673	99.5192	99.0881	98.8382	99.4577
A/N+K	1.16718	1.10647	3.32505	1.10029	1.0671	1.07963	1.10554	1.18383	41.7426	1.07391	10.5196	1.46324	1.32602	1.0882	16.1791	1.94311
A/CNK	1.05661	0.919531	0.928184	1.03928	0.902641	0.931653	0.879019	1.14117	12.3653	1.01454	7.44532	1.02211	1.10347	0.976451	11.8641	1.73975
Rock names (gph, granophyre; b.a., basaltic andesite; rhy, rhyolite and dac, dacite).
The samples AL3, AL5, AL10 and AL11 are altered.
A/CNK = mol Al2O3/(CaO+Na2O+K2O); A/N+K = mol Al2O3/(Na2O+K2O).
